# Supplementary material
Source: publisher figshare collection journal article supplement (https://sage.figshare.com/ndownloader/files/16214531)
Supplement: Supplementary file 1 [file 16214531]

A

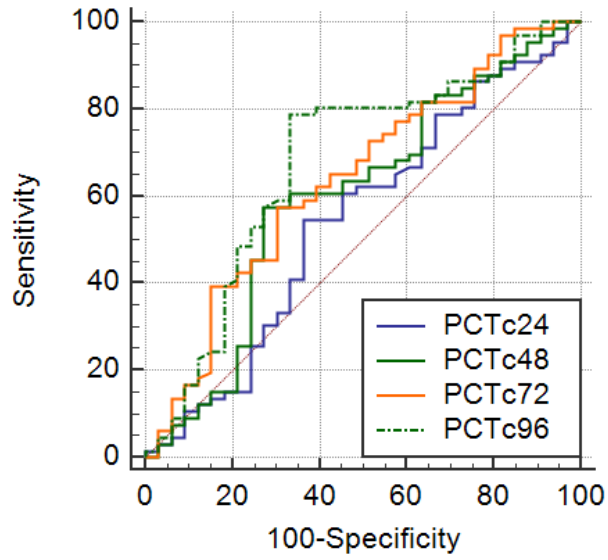

B

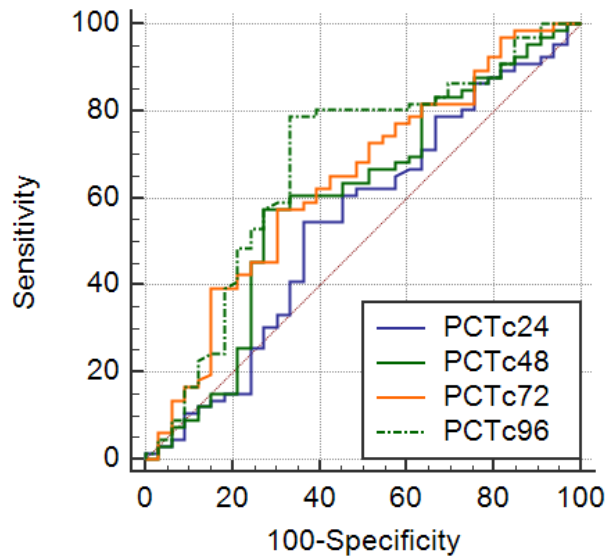

Figure S1. Receiver operating characteristic curves for PCTc at 24, 48, 72 and 96 h for patients presenting with sepsis according to the Sepsis-3 criteria.

(A) Hospital mortality: PCTc 24h (n = 271), AUC = 0.61 (CI 95%, 0.55-0.67); PCTc 48h (n = 285), AUC = 0.65 (CI 95%, 0.59-0.71); PCTc 72h (n = 179), AUC = 0.68 (CI 95%, 0.61-0.75); PCTc 96h (n = 119), AUC = 0.68 (CI 95%, 0.58-0.76).

(B) 90-day mortality: PCTc 24h (n = 267), AUC = 0.63 (CI 95%, 0.57-0.69); PCTc 48h (n = 280), AUC = 0.65 (CI 95%, 0.59-0.71); PCTc 72h (n = 179), AUC = 0.68 (CI 95%, 0.60-0.75); PCTc 96h (n = 119), AUC = 0.65 (CI 95%, 0.56-0.74).

AUC, receiver operating characteristic curves. PCTc, procalcitonin clearance.
